# Supplementary material for: Confined condensation synthesis and magnetic properties of layered copper hydroxide frameworks
Source: Royal Society of Chemistry journal article supplement (doi:10.1039/c7dt00071e), 2017-01-01
Supplement: c7dt00071e1.pdf [file c7dt00071e1.pdf]

Electronic Supplementary Information (ESI) for:

**Confined condensation synthesis and magnetic properties of  
layered copper hydroxide frameworks**

**Seong-Hun Park,<sup>a</sup> Myung-Hwa Jung,<sup>b</sup> Yong-Jung Lee<sup>c</sup> and Young-Duk Huh<sup>\*c</sup>**

*<sup>a</sup>Gyeonggi Science High School for the Gifted, Suwon-si, Gyeonggi-do, 16297, Republic  
of Korea*

*<sup>b</sup>Department of Physics, Sogang University, Seoul, 04107, Republic of Korea*

*<sup>c</sup>Department of Chemistry, Dankook University, Cheonan-si, Chungcheongnam-do,  
31116, Republic of Korea*

*<sup>\*</sup>E-mail: ydhuh@dankook.ac.kr; Fax: +82-41-559-7860; Tel: +82-41-550-3458*

## Supplementary Figure 1

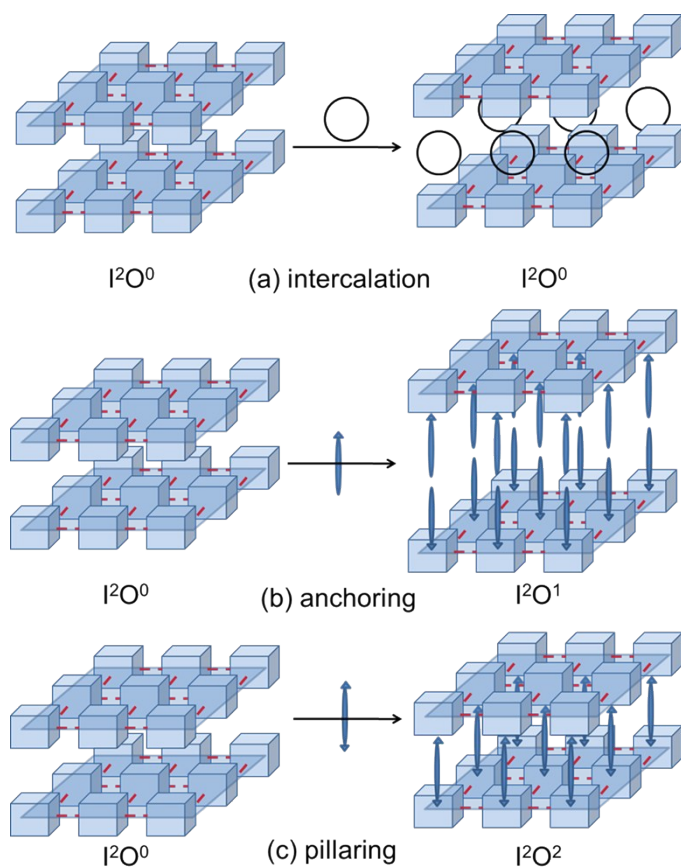

Figure S1. Schematic diagrams of the three kinds of intercalation processes according to Cheetham's classification of hybrid inorganic-organic frameworks: (a) intercalation, (b) anchoring, and (c) pillaring. The square blocks and the dotted red lines represent the inorganic components and the bonding between the inorganic components respectively.  $I^nO^m$  is a hybrid inorganic-organic framework classification as proposed by Cheetham et al.<sup>3</sup>

**Supplementary Figure 2**

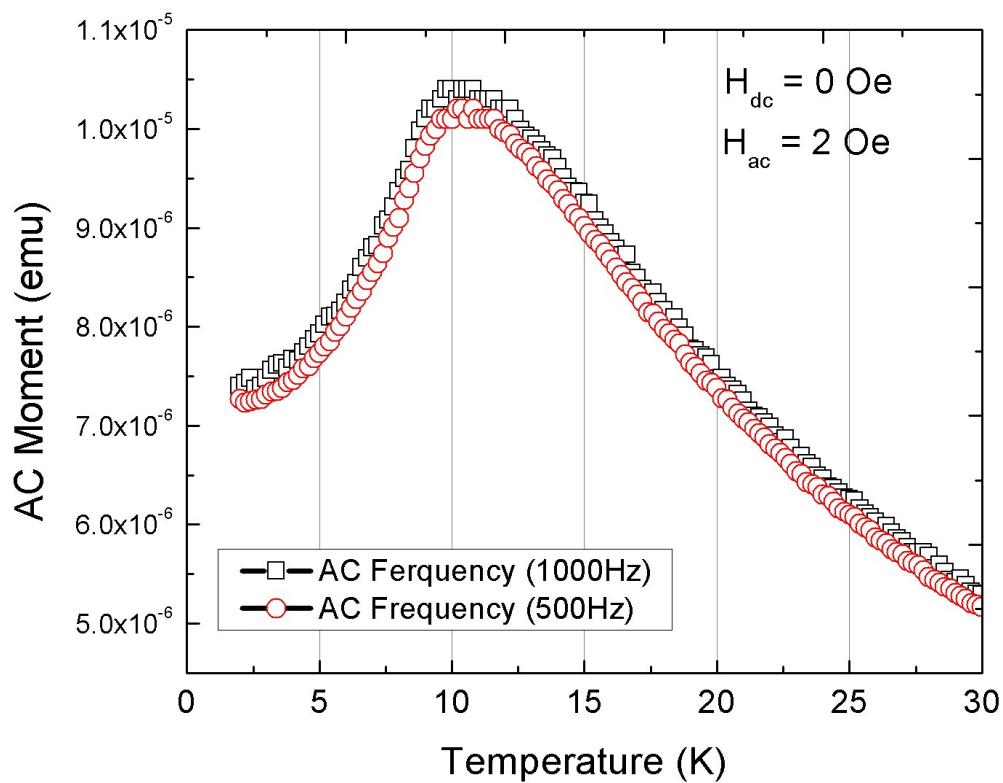

Figure S2. The temperature dependence of the AC magnetic susceptibilities of Cu-OH-DS, measured at AC field,  $H_{ac} = H_0 \sin(2\pi ft)$  for  $H_0 = 2 \text{ Oe}$  and  $f = 500$  and  $1000 \text{ Hz}$ .

### Supplementary Figure 3

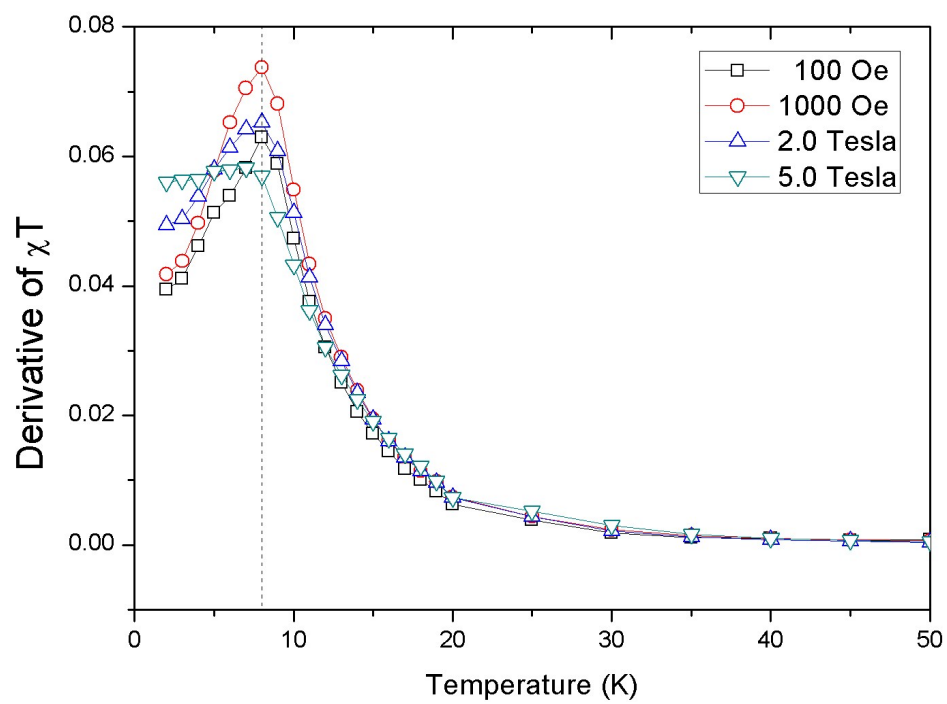

Figure S3. Derivatives of  $\chi T$  for Cu-OH-DS under various applied magnetic fields.
